# Supplementary material for: Application of the qSOFA score to predict mortality in patients with suspected infection in a resource-limited setting in Malawi
Source: Springer Nature journal article supplement (doi:10.1007/s15010-017-1057-5), 2017-08-07
Supplement: MOESM1 [file 13354368]

**Supplementary table 1 Predictive value of qSOFA in HIV positive patients**

|                                       | <b>qSOFA ≥2</b>  | <b>GCS&lt;15</b> | <b>qSOFA≥2 and/or GCS&lt;15</b> |
|---------------------------------------|------------------|------------------|---------------------------------|
| Sensitivity, % (95% CI)               | 68 (53-80)       | 60 (45-73)       | 78 (64-88)                      |
| Specificity, % (95% CI)               | 63 (55-70)       | 87 (81-92)       | 59 (51-67)                      |
| Positive predictive value, % (95% CI) | 36 (26-46)       | 58 (44-72)       | 37 (28-47)                      |
| Negative predictive value, % (95% CI) | 86 (79-92)       | 88 (81-92)       | 90 (82-95)                      |
| AUROC (95% CI)                        | 0.69 (0.61-0.77) | 0.74 (0.65-0.82) | 0.77 (0.69-0.84)                |

Abbreviations: qSOFA, quick sequential organ failure assessment; GCS, Glasgow coma scale; AUROC, area under the receiver operating characteristic.

**Supplementary table 2 Predictive value of qSOFA in HIV negative patients**

|                                       | <b>qSOFA≥2</b>   | <b>GCS&lt;15</b> | <b>qSOFA≥2 and/or GCS&lt;15</b> |
|---------------------------------------|------------------|------------------|---------------------------------|
| Sensitivity, % (95% CI)               | 71 (55-84)       | 45 (30-61)       | 79 (63-90)                      |
| Specificity, % (95% CI)               | 75 (66-81)       | 81 (74-87)       | 66 (58-74)                      |
| Positive predictive value, % (95% CI) | 45 (33-58)       | 41 (27-57)       | 41 (30-52)                      |
| Negative predictive value, % (95% CI) | 90 (83-94)       | 83 (76-89)       | 91 (84-96)                      |
| AUROC (95% CI)                        | 0.75 (0.67-0.83) | 0.63 (0.53-0.73) | 0.76 (0.67-0.84)                |

Abbreviations: qSOFA, quick sequential organ failure assessment; GCS, Glasgow coma scale; AUROC, area under the receiver operating characteristic.
